# Supplementary material for: Bottom-up fabrication of artery-mimicking tubular co-cultures in collagen-based microchannel scaffolds
Source: Royal Society of Chemistry journal article supplement (doi:10.1039/c6bm00340k), 2016-01-01
Supplement: c6bm00340k1.pdf [file c6bm00340k1.pdf]

## Bottom-up fabrication of artery-mimicking tubular co-cultures in collagen-based microchannel scaffolds

A. Tan,\*† K. Fujisawa, Y. Yukawa and Y.T. Matsunaga\*

### Supporting Information

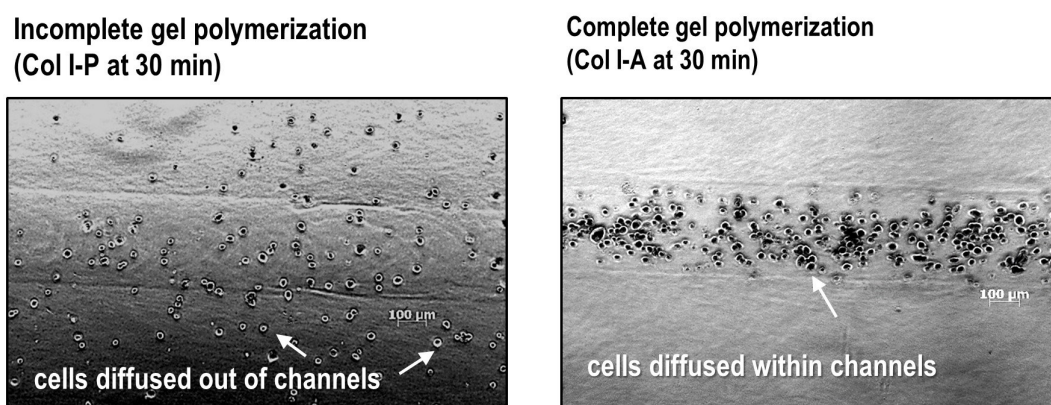

Fig. S1 Visual evaluation of the rigidity of the collagen microchannel during partial and complete gel polymerization: (left) incomplete gel polymerization of collagen Type I-P (at 30 min) resulted in a fragile scaffold where cells diffused out of the microchannel when seeded using a micropipette from the inlet reservoir; (right) collagen Type I-A was completely polymerized (at 30 min) and enabled reproducible seeding of cells within the microchannel cavity.
